# Supplementary material for: Solanum lycopersicum GOLDEN 2-LIKE 2 transcription factor affects fruit quality in a light- and auxin-dependent manner
Source: PLoS One. 2019 Feb 12;14(2):e0212224. doi: 10.1371/journal.pone.0212224 (PMC6372215; doi:10.1371/journal.pone.0212224)
Supplement: S2 Table — (XLSX) [file pone.0212224.s005.xlsx]

## Sheet: Supplementary Table S2
S2 Table. Relative transcript values of SlGLK2 in tomato fruits from SlGLK2, Slglk2 and au-SlGLK2 genotypes.
Genotype	Portion	Immature Green 3	Immature Green 5	Mature Green	Breaker	Breaker+3	Breaker+5
SlGLK2	Pedicellar	3.44 ± 0.69*	4.55 ± 0.36*	5.21 ± 0.81*∆	4.57 ± 0.56*	1.56 ± 0.38∆	0.42 ± 0.09∆
	Basal	1.00 ± 0.66	0.96 ± 0.49	1.99 ± 0.34	1.50 ± 0.14	ND	ND
Slglk2	Pedicellar	0.31 ± 0.07*+	0.52 ± 0.05*∆+	2.01 ± 0.28*∆+	1.65 ± 0.21*∆+	0.13 ± 0.01∆+	0.01 ± 0.00∆+
	Basal	0.12 ± 0.04	0.09 ± 0.03	0.62 ± 0.09	0.54 ± 0.22	ND	ND
au-SlGLK2	Pedicellar	9.79 ± 3.86*+	44.13 ± 14.20*∆+	5.33 ± 1.08*∆	1.58 ± 0.34*∆+	0.15 ± 0.01∆+	0.01 ± 0.00∆+
	Basal	2.41 ± 0.66	1.95 ± 0.58	2.27 ± 1.31	0.44 ± 0.04	ND	ND
Values represent means ± SE of at least three biological replicates normalised against the basal IG3 sample from SlGLK2 genotype. Statistically significant differences between the pedicellar and basal samples are indicated by asterisks (P < 0.05). Within the pedicellar samples from each genotype, statistically significant differences to the respective IG3 sample are indicated by triangles (P < 0.…
